# Supplementary material for: Genetics of acute myeloid leukemia in the elderly: mutation spectrum and clinical impact in intensively treated patients aged 75 years or older
Source: PubMed Central journal article supplement — Haematologica. 2018 Jun 14;103(11):1853–61. doi: 10.3324/haematol.2018.191536 (PMC6278991; doi:10.3324/haematol.2018.191536), 2018-11
Supplement: 2018.191536.PRASSEK_SUPPL.pdf [file 2018.191536.PRASSEK_SUPPL.pdf]

## Genetics of acute myeloid leukemia in the elderly: mutation spectrum and clinical impact in intensively treated patients aged 75 years or older

Victoria V. Prassek,<sup>1</sup> Maja Rothenberg-Thurley,<sup>1</sup> Maria C. Sauerland,<sup>2</sup> Tobias Herold,<sup>1,3,4</sup> Hanna Janke,<sup>1</sup> Bianka Ksienzyk,<sup>1</sup> Nikola P. Konstandin,<sup>1</sup> Dennis Goerlich,<sup>2</sup> Utz Krug,<sup>5</sup> Andreas Faldum,<sup>2</sup> Wolfgang E. Berdel,<sup>2</sup> Bernhard Wörmann,<sup>6</sup> Jan Braess,<sup>7</sup> Stephanie Schneider,<sup>1</sup> Marion Subklewe,<sup>1</sup> Stefan K. Bohlander,<sup>8</sup> Wolfgang Hiddemann,<sup>1,3,4</sup> Karsten Spiekermann<sup>1,3,4</sup> and Klaus H. Metzeler<sup>1,3,4</sup>

<sup>1</sup>Laboratory for Leukemia Diagnostics, Department of Medicine III, University Hospital, LMU Munich, Germany; <sup>2</sup>Institute of Biostatistics and Clinical Research, University of Münster, Germany; <sup>3</sup>German Cancer Consortium (DKTK), Partner Site Munich, Germany; <sup>4</sup>German Cancer Research Center (DKFZ), Heidelberg, Germany; <sup>5</sup>Hospital Leverkusen, Germany; <sup>6</sup>Charité – University Hospital Berlin, Germany; <sup>7</sup>Department of Oncology and Hematology, Hospital Barmherzige Brüder, Regensburg, Germany and <sup>8</sup>Department of Molecular Medicine and Pathology, University of Auckland, New Zealand

©2018 Ferrata Storti Foundation. This is an open-access paper. doi:10.3324/haematol.2018.191536

Received: February 22, 2018.

Accepted: June 11, 2018.

Pre-published: June 14, 2018.

Correspondence: klaus.metzeler@med.uni-muenchen.de

---

**Supplemental Appendix**

**to**

**V. V. Prassek et al.:**

**Genetics of acute myeloid leukemia in the elderly: mutation  
spectrum and clinical impact in intensively treated patients  
aged  $\geq 75$  years**

## Supplemental Methods

### Treatment Protocol

Participants aged  $\geq 60$  years were randomized to receive intensive induction chemotherapy with one cycle of TAD-9 (thioguanine  $100 \text{ mg/m}^2$  twice daily on days 3-9, cytarabine  $100 \text{ mg/m}^2/\text{d}$  continuous infusion on days 1+2 and  $100 \text{ mg/m}^2$  twice daily on days 3-8, and daunorubicin  $60 \text{ mg/m}^2$  on days 3-5) or HAM (cytarabine  $1 \text{ g/m}^2$  twice daily on days 1-3 and mitoxantrone  $10 \text{ mg/m}^2$  on days 3-5). A second induction cycle (HAM) was administered from day 21 only if  $\geq 5\%$  residual blasts were present in a day 15 BM aspirate. Another cycle of TAD-9 was given as a consolidation therapy, followed by monthly cytarabine-based maintenance chemotherapy.

## Supplemental Results

We analyzed outcomes according to the randomized induction arm, stratified by MRC cytogenetic risk group. Favorable- and intermediate-risk patients treated with HAM induction tended to have longer OS than patients treated with TAD (median OS: TAD, 3.3 months vs. HAM, 8.8 months;  $p=0.16$ ; Supplemental Figure 3B). MRC adverse-risk patients treated with HAM also tended to have a longer OS (median OS, TAD, 0.9 months vs. HAM, 4.6 months;  $p=0.10$ ; Supplemental Figure 3C).

## Supplemental Figure 1

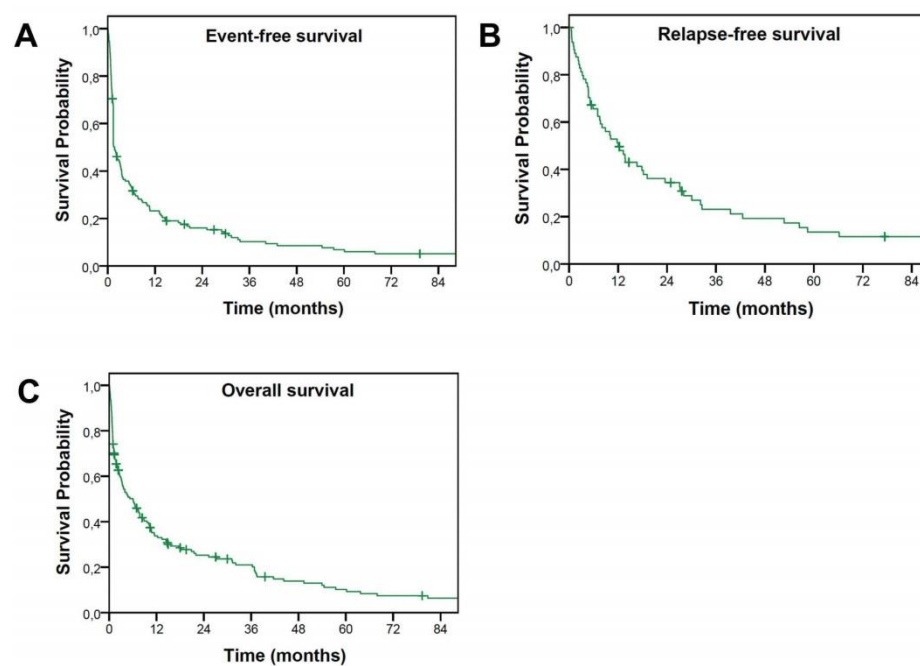

**Supplemental Figure 1: Survival outcomes of intensively treated AML patients aged  $\geq 75$  years.**

- A)** Event-free survival
- B)** Relapse-free survival
- C)** Overall survival

## Supplemental Figure 2

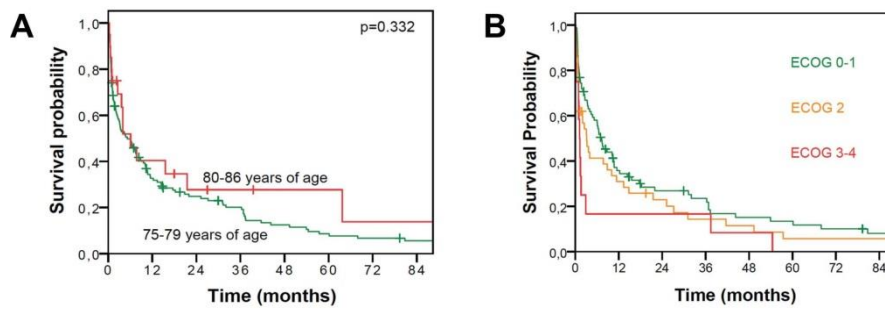

### Supplemental Figure 2: Overall survival according to age and Eastern Cooperative Oncology Group (ECOG) performance status

**A)** Impact of age at diagnosis on overall survival. Patients aged 75-79 years at diagnosis are shown in green; patients aged 80-86 years at diagnosis are shown in red.

**B)** Impact of Eastern Cooperative Oncology Group performance status (ECOG PS) on overall survival. Patients with an ECOG PS of 0-1 are shown in green, patients with an ECOG PS of 2 are shown in orange, and patients with an ECOG PS of 3-4 are shown in red.

**Supplemental Figure 3**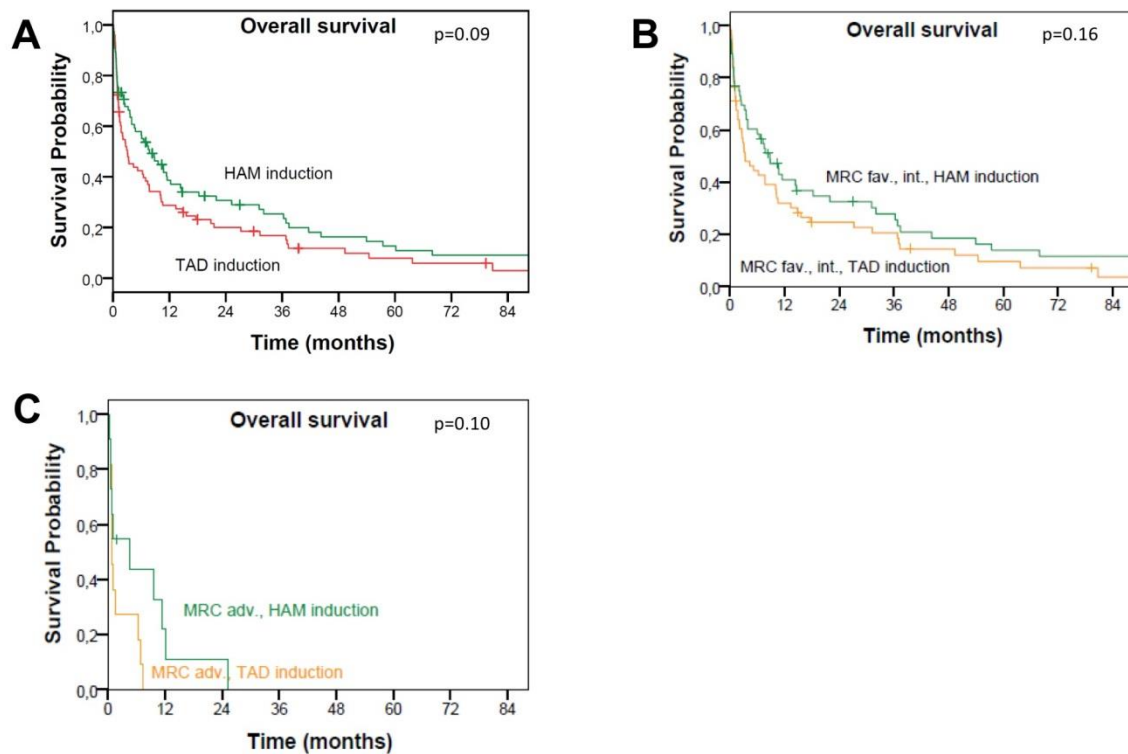

**Supplemental Figure 3: Overall survival according to treatment arm (TAD induction vs. HAM induction)**

**A)** Overall survival of patients randomized to TAD induction (red) vs. HAM induction (green).

**B)** Overall survival of MRC favorable or intermediate risk patients randomized to TAD induction (orange) vs. HAM induction (green).

**C)** Overall survival in MRC adverse risk patients risk randomized to TAD induction (orange) vs. HAM induction (green).

**Supplemental Figure 4**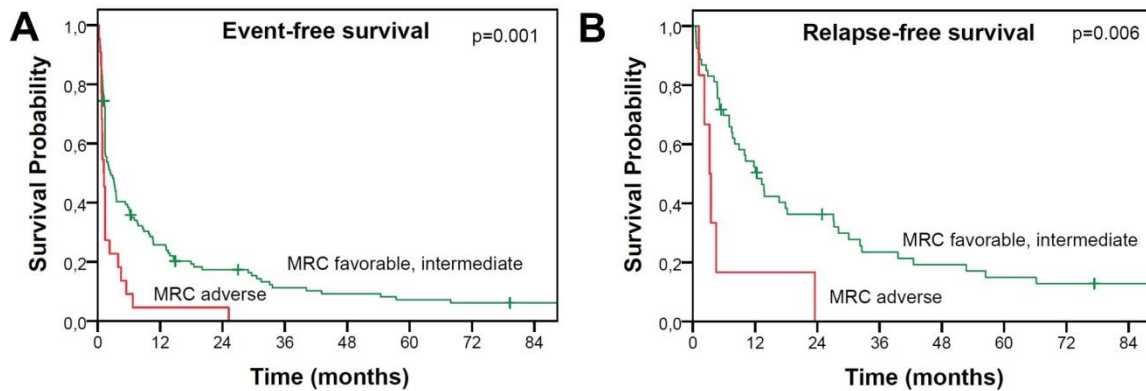**Supplemental Figure 4: Survival according to MRC risk classification**

**A)** Event-free survival in MRC favorable and intermediate-risk (green) vs. MRC adverse-risk (red) patients.

**B)** Relapse-free survival in MRC favorable and intermediate-risk (green) vs. MRC adverse-risk (red) patients.

**Supplemental Figure 5**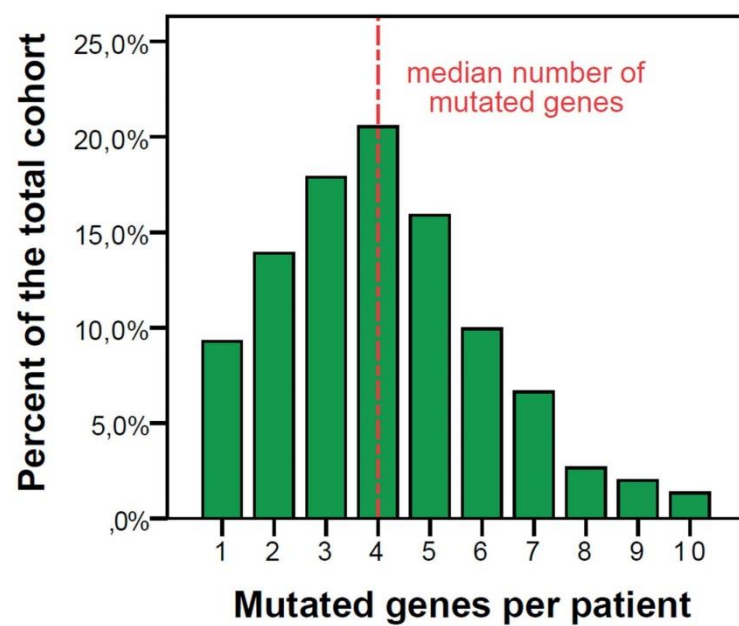

**Supplemental Figure 5:** Number of mutated driver genes per patient, shown as percentage of the entire cohort.

**Supplemental Figure 6**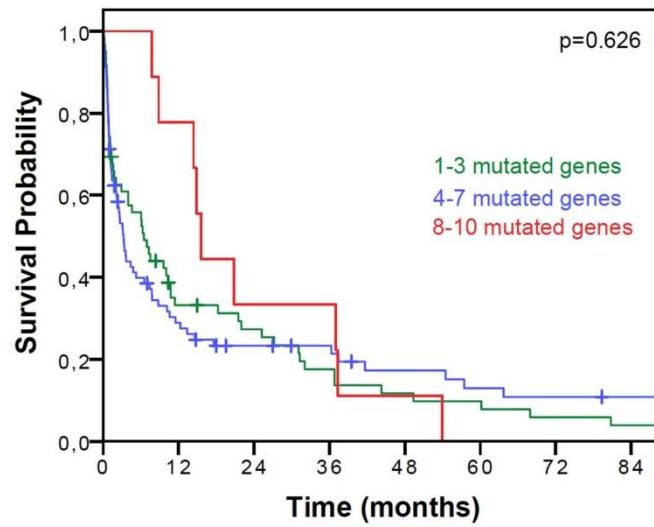

**Supplemental Figure 6:** Overall survival of patients who harbored 1-3 (green ), 4-7 (purple) or 8-11 (red ) driver gene mutations.

## Supplemental Figure 7

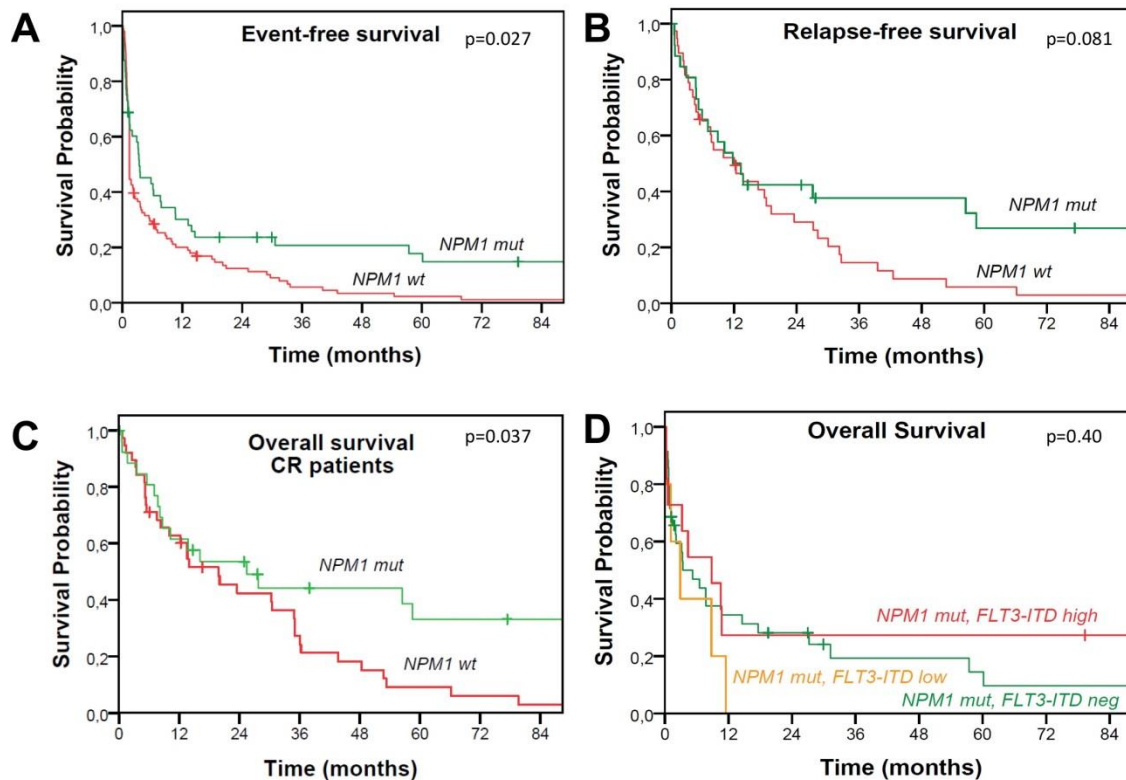

**Supplemental Figure 7: Survival according to *NPM1* mutation status and *FLT3*-ITD allelic ratio**

**A)** Event free survival of *NPM1* mutated patients (green) compared to *NPM1* wildtype patients (red).

**B)** Relapse-free survival of *NPM1* mutated patients (green) compared to *NPM1* wildtype patients (red).

**C)** Overall survival (OS) of *NPM1* mutated patients (green) compared to *NPM1* wildtype patients (red) who achieved CR (calculated from the day of achieving CR).

**D)** Overall survival of *NPM1* mutated/*FLT3*-ITD negative patients (green) compared to *NPM1* mutated/*FLT3*-ITD mutated patients with high allelic ratio ( $\geq 0.5$ ; red) or low allelic ratio ( $< 0.5$ ; orange).

**Abbreviations:** “Mut” denotes mutated and “wt” wildtype.

## Supplemental Figure 8

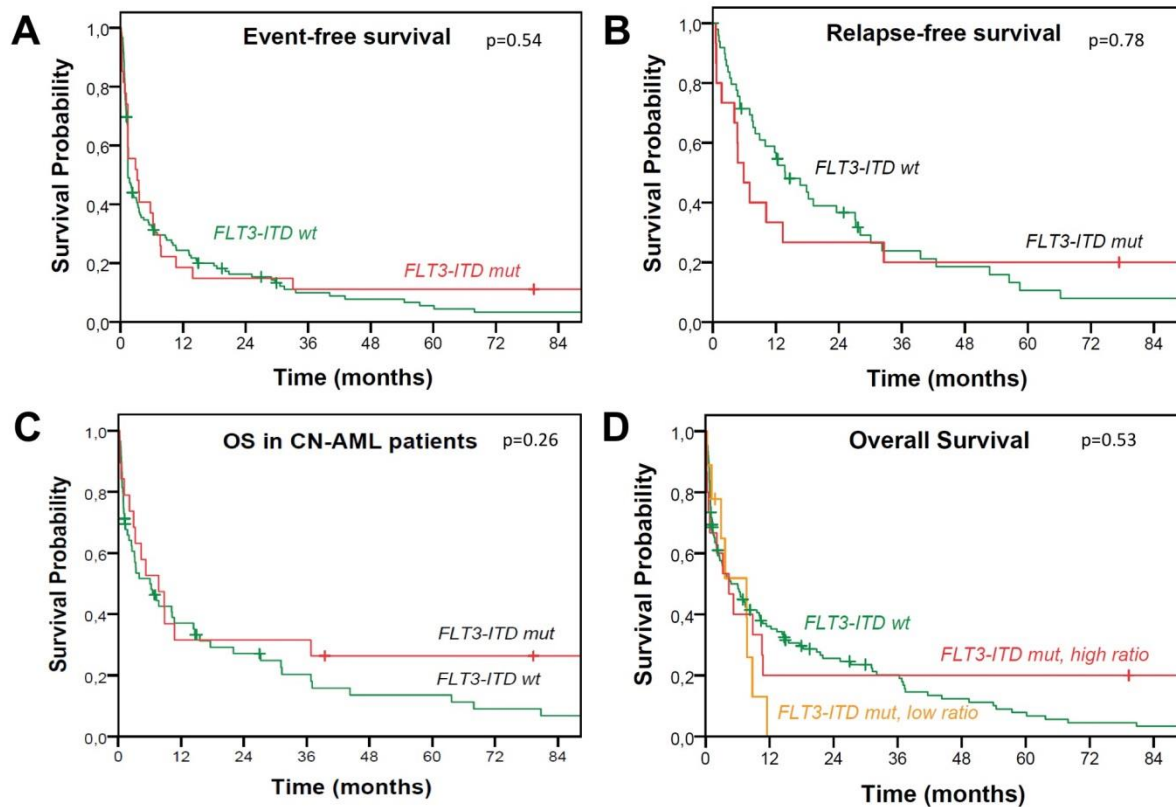Supplemental Figure 8: Survival and *FLT3*-ITD mutations

**A)** Event-free survival of *FLT3*-ITD mutated patients (red) compared to *FLT3*-ITD wildtype patients (green).

**B)** Relapse-free survival of *FLT3*-ITD mutated patients (red) compared to *FLT3*-ITD wildtype patients (green).

**C)** Overall survival of *FLT3*-ITD mutated patients (red) compared to *FLT3*-ITD wildtype patients (green) in cytogenetic normal (CN) AML patients.

**D)** Overall survival of *FLT3*-ITD mutated patients with high allelic ratio ( $\geq 0.5$ , red) compared to patients with low allelic ratio ( $< 0.5$ , orange) and *FLT3*-ITD wildtype patients (green).

**Abbreviations:** “Mut” denotes mutated and “wt” wildtype.

## Supplemental Figure 9

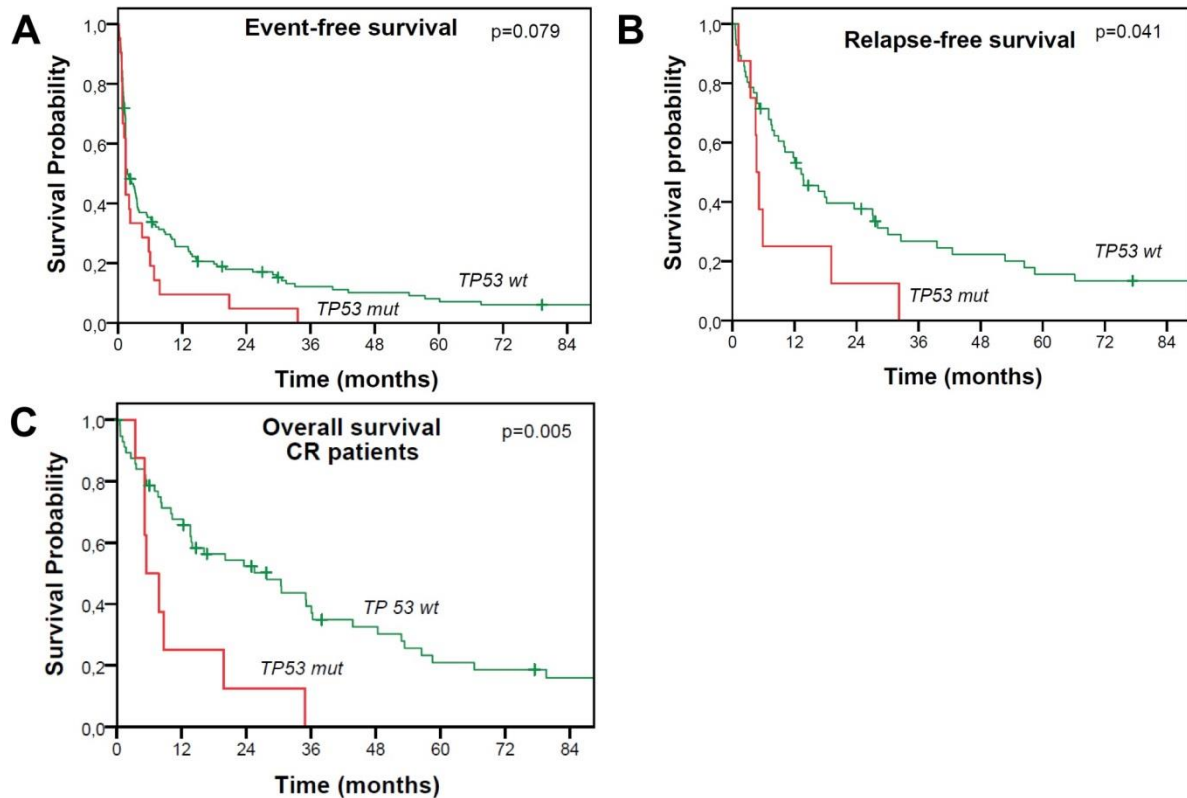

### Supplemental Figure 9: Survival and *TP53* mutations

**A)** Event-free survival in *TP53* mutated patients (red) compared to *TP53* wildtype patients (green).

**B)** Relapse-free survival in *TP53* mutated patients (red) compared to *TP53* wildtype patients (green).

**C)** Overall survival in *TP53* mutated patients (red) compared to *TP53* wildtype patients (green) who achieved CR (calculated from the day of achieving CR).

**Abbreviations:** “Mut” denotes mutated and “wt” wildtype.

## Supplemental Figure 10

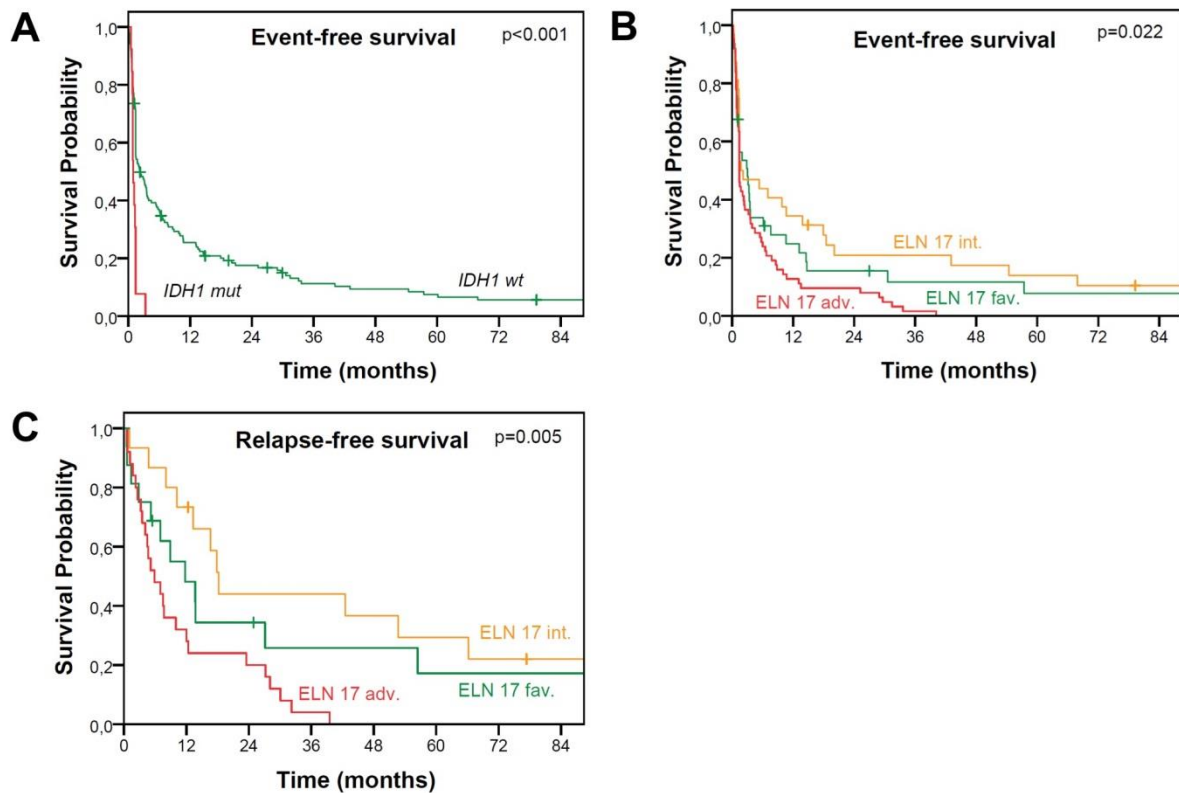

**Supplemental Figure 10: Survival according to *IDH1* mutation status and ELN 2017 classification**

**A)** Event-free survival in *IDH1* mutated (red) and *IDH1* wildtype (green) patients.

**B)** Event-free survival in favorable (green), intermediate (orange) and adverse risk (red) patients according to ELN 2017 classification.

**C)** Relapse-free survival in favorable (green), intermediate (orange) and adverse risk (red) patients according to ELN 2017 classification.

**Abbreviations:** “Mut” denotes mutated and “wt” wildtype.

**Supplemental Table 1: Response rates (CR+CRi) and overall survival according to common gene mutations**

| Gene                   | CR rate |          | p      | OS at 2 years |          | p      |
|------------------------|---------|----------|--------|---------------|----------|--------|
|                        | mutated | wildtype |        | mutated       | wildtype |        |
| <b><i>TET2</i></b>     | 57%     | 41%      | 0.07   | 27%           | 24%      | 0.19   |
| <b><i>DNMT3A</i></b>   | 53%     | 45%      | 0.40   | 27%           | 25%      | 0.58   |
| <b><i>NPM1</i></b>     | 56%     | 44%      | 0.17   | 30%           | 23%      | 0.09   |
| <b><i>SRSF2</i></b>    | 47%     | 48%      | 0.99   | 37%           | 21%      | 0.46   |
| <b><i>ASXL1</i></b>    | 42%     | 49%      | 0.55   | 18%           | 27%      | 0.21   |
| <b><i>RUNX1</i></b>    | 36%     | 50%      | 0.21   | 19%           | 27%      | 0.18   |
| <b><i>FLT3-ITD</i></b> | 56%     | 46%      | 0.40   | 23%           | 26%      | 0.32   |
| <b><i>NRAS</i></b>     | 48%     | 48%      | 0.99   | 17%           | 27%      | 0.80   |
| <b><i>IDH2</i></b>     | 57%     | 46%      | 0.38   | 45%           | 22%      | 0.53   |
| <b><i>TP53</i></b>     | 38%     | 49%      | 0.36   | 7%            | 28%      | 0.07   |
| <b><i>BCOR</i></b>     | 45%     | 48%      | 0.82   | 27%           | 25%      | 0.69   |
| <b><i>FLT3-TKD</i></b> | 50%     | 47%      | 0.99   | 22%           | 26%      | 0.91   |
| <b><i>IDH1</i></b>     | 0%      | 52%      | <0.001 | 0%            | 28%      | <0.001 |
| <b><i>STAG2</i></b>    | 62%     | 46%      | 0.39   | 42%           | 24%      | 0.13   |

**Abbreviations:** CR: complete remission; OS, overall survival, ITD: internal tandem duplication; TKD: tyrosine kinase domain mutation

**Supplemental Table 2: Clinical characteristics of *IDH1* mutated compared to *IDH1* wildtype patients.**

|                               | <i>IDH1</i> wildtype | <i>IDH1</i> mutated | p    |
|-------------------------------|----------------------|---------------------|------|
| <b>Median age</b> (years)     | 76                   | 78                  | 0.08 |
| <b>Median BM blasts</b> (%)   | 80                   | 78                  | 0.90 |
| <b>Median PB blasts</b> (%)   | 24                   | 57                  | 0.60 |
| <b>Median WBC</b> (G/l)       | 14.8                 | 3                   | 0.10 |
| <b>Median Platelets</b> (G/l) | 50                   | 69                  | 0.17 |

**Footnote:** The p-values were calculated by the Mann-Whitney U-Test.

**Abbreviations:** BM: bone marrow; PB: peripheral blood; WBC: White blood cell count

**Supplemental Table 3: Clinical characteristics of the 13 *IDH1* mutated patients**

| Patient No. | Age | Sex | ECOG PS | Disease type | MRC | ELN 2017 | VAF  | Induction result | EFS (days) | OS (days) |
|-------------|-----|-----|---------|--------------|-----|----------|------|------------------|------------|-----------|
| 1           | 78  | f   | 1       | de novo      | int | fav      | 0.41 | early death      | 21         | 21        |
| 2           | 81  | f   | 1       | de novo      | int | int      | 0.23 | refractory       | 42         | 78        |
| 3           | 77  | f   | 1       | sAML         | adv | int      | 0.27 | early death      | 26         | 26        |
| 4           | 75  | m   | 1       | de novo      | int | adv      | 0.46 | early death      | 15         | 15        |
| 5           | 75  | m   | 1       | de novo      | int | fav      | 0.11 | early death      | 42         | 42        |
| 6           | 79  | m   | 2       | sAML         | int | adv      | 0.38 | early death      | 26         | 26        |
| 7           | 78  | f   | 1       | tAML         | int | fav      | 0.48 | early death      | 33         | 33        |
| 8           | 79  | f   | 1       | sAML         | int | int      | 0.38 | refractory       | 42         | 218       |
| 9           | 78  | m   | -       | de novo      | int | adv      | 0.32 | early death      | 26         | 26        |
| 10          | 79  | f   | 3       | de novo      | int | adv      | 0.38 | early death      | 38         | 38        |
| 11          | 79  | m   | 2       | de novo      | int | int      | 0.5  | early death      | 28         | 28        |
| 12          | 78  | m   | 2       | de novo      | -   | -        | 0.5  | early death      | 24         | 24        |
| 13          | 75  | f   | 1       | de novo      | int | -        | 0.43 | unknown          | 99         | 99        |

**Abbreviations:** f: female; m: male; ECOG PS: Eastern Cooperative Oncology Group performance status; sAML: secondary AML; tAML: therapy-related AML; MRC: British Medical Research Council; ELN 2017: European LeukaemiaNet risk classification; fav: favorable-risk group; int: intermediate-risk group; adv: adverse-risk group; VAF, Variant allele frequency; EFS: Event-free survival; OS: Overall survival
