# Supplementary material for: Genetics of acute myeloid leukemia in the elderly: mutation spectrum and clinical impact in intensively treated patients aged 75 years or older
Source: PubMed Central journal article supplement — Haematologica. 2018 Jun 14;103(11):1853–61. doi: 10.3324/haematol.2018.191536 (PMC6278991; doi:10.3324/haematol.2018.191536), 2018-11
Supplement: 2018_191536-Disclosures_and_Contributions.pdf [file 2018_191536-Disclosures_and_Contributions.pdf]

Haematologica  
HAEMATOL/2018/191536  
Version 3

Genetics of acute myeloid leukemia in the elderly: mutation spectrum and clinical impact in intensively treated patients aged  $\geq 75$  years

Victoria V. Prassek, Maja Rothenberg-Thurley, Maria C. Sauerland, Tobias Herold, Hanna Janke, Bianka Ksienzyk, Nikola P. Konstandin, Dennis Goerlich, Utz Krug, Andreas Faldum, Wolfgang E. Berdel, Bernhard Wörmann, Jan Braess, Stephanie Schneider, Marion Subklewe, Stephan K. Bohlander, Wolfgang Hiddemann, Karsten Spiekermann, and Klaus H. Metzeler

Disclosures: This study was supported by an European Hematology Association (EHA) Clinical Research Fellowship to K.H.M., by grant support from Deutsche Forschungsgemeinschaft (DFG SFB 1243 to M.S., W.H., K.S. and K.H.M.), and by the German Cancer Consortium (DKTK, Heidelberg, Germany) and by the Wilhelm-Sander-Stiftung (grant 2013.086.1) to T.H. and K.S.. AMLCG clinical trials were supported by Deutsche Krebshilfe (grants 70-2839-Bü4 and 108584). S.K.B. gratefully acknowledges support from Leukemia & Blood Cancer New Zealand and the family of Marijanna Kumerich. V.V.P. received travel support from Janssen and Celgene. U.K. received travel support from Celgene, Janssen, Amgen, Merck, and Boehringer Ingelheim, reimbursements for advisory board membership from Janssen, Celgene, Roche, Amgen, Jazz Pharma, and Sunesis Pharmaceuticals, and honoraria from Jazz Pharmaceuticals and Celgene. W.H. received grant support from Celgene. K.H.M. has received research funding and honoraria from Celgene. All other authors have no disclosures.

Contributions: VVP, MR-T, TH, HJ, BK, and NK performed experiments and collected data. MCS, DG, and AF were responsible for clinical trial data management. UK, WEB, BW, JB, MS, WH, and KS were involved in patient care, collection of clinical data, and the planning and conduct of AMLCG clinical trials. VVP, MR-T, MCS and KHM analyzed the data. SKB, WH, KS and KHM participated in the design of the study, and supervised the experiments and data analysis. VVP and KHM wrote the manuscript. All co-authors reviewed the manuscript and approved its submission.
