# Supplementary material for: Genetics of acute myeloid leukemia in the elderly: mutation spectrum and clinical impact in intensively treated patients aged 75 years or older
Source: PubMed Central journal article supplement — Haematologica. 2018 Jun 14;103(11):1853–61. doi: 10.3324/haematol.2018.191536 (PMC6278991; doi:10.3324/haematol.2018.191536), 2018-11
Supplement: HAEMATOL-2018-191536v3-Prassek-01.pdf [file HAEMATOL-2018-191536v3-Prassek-01.pdf]

# Identification of genetic markers as tools for risk stratification and treatment selection in very old acute myeloid leukemia patients

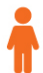

151 Patients with acute myeloid leukemia (AML), median age 76 (75-86 years)

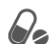

Induction chemotherapy

|                                    | Overall    | High-dose cytarabine and mitoxantrone (HAM) | Standard-dose cytarabine, daunorubicin and 6-thioguanine (TAD-9) |        |
|------------------------------------|------------|---------------------------------------------|------------------------------------------------------------------|--------|
| Complete remission (CR)            | 44%        |                                             |                                                                  |        |
| Median event-free survival (EFS)   | 1.7 months |                                             |                                                                  |        |
| Median relapse-free survival (RFS) | 12 months  |                                             |                                                                  |        |
| Median overall survival (OS)       | 6 months   | 7.8 months                                  | 3.1 months                                                       | p=0.09 |
| Three-year OS                      | 21%        |                                             |                                                                  |        |

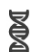

Analysis of 64 genes recurrently mutated in AML

- Identification of 622 driver mutations
- Median number of 4 mutated genes per patient (range, 1-10 mutations/patient)
- Most frequently mutated genes
 

|               |     |                  |     |                 |     |
|---------------|-----|------------------|-----|-----------------|-----|
| <i>TET2</i>   | 42% | <i>ASXL1</i>     | 21% | <i>IDH2</i>     | 15% |
| <i>DNMT3A</i> | 35% | <i>RUNX1</i>     | 19% | <i>TP53</i>     | 14% |
| <i>NPM1*</i>  | 32% | <i>FLT3-ITD*</i> | 18% | <i>FLT3-TKD</i> | 12% |
| <i>SRSF2</i>  | 25% | <i>NRAS</i>      | 17% | <i>IDH1</i>     | 9%  |

• The number of mutated genes per patient was not associated with OS

## • Univariate analysis

IDH1 was the only gene significantly associated with OS

**IDH1 mutations were identified as the strongest genetic predictor of shorter survival**

\*no significant impact on OS
